# Supplementary material for: Septal cholinergic input to CA2 hippocampal region controls social novelty discrimination via nicotinic receptor-mediated disinhibition
Source: eLife. 2021 Oct 26;10:e65580. doi: 10.7554/eLife.65580 (PMC8547952; doi:10.7554/eLife.65580)
Supplement: Figure 2—source data 1. [file elife-65580-fig2-data1.xlsx]

## Sheet: MS-ChAT (SI)
20X objective
sample	tot nuclei#	tot Fos+	tot chat+	chat+Fos+	% fos+	%chat fos+		Legend
HCC								set= animal
naive set1_b1_1	820	2	2	0				b= section
naive set1_b1_2	904	4	11	0				_n= field
naive set1_b1_3	1120	3	5	0
naive set1_b2_3	1232	10	15	0
naive set1_b2_4	1136	9	24	0
naive set1_b3_1	1072	8	22	0
tot	6284	36	79		0.572884	0
naive set2_b1_1	600	12	1	0
naive set2_b1_2	825	10	17	0
naive set2_b2_3	650	6	25	0
naive set2_b3_1	1400	19	11	0
tot	3475	47	54	0	1.35252	0
naive set3_b1_1	1100	2	8	0
naive set3_b1_3	890	7	9	0
naive set3_b1_2	910	5	5	1
naive set3_b1_4	1100	3	15	0
naive set3_b2_1	740	7	12	0
naive set3_b2_2	880	10	18	0
naive set3_b2_3	1050	7	19	0
tot	6670	41	86	1	0.614693	1.16279
naive set4_b1_2	1560	1	52	0
naive set4_b2_1	725	5	18	0
naive set4_b2_2	1125	4	36	0
naive set4_b1_1	875	4	18	0
tot	4285	14	124	0	0.326721	0
Social interaction
SI-set1	tot nuclei#	tot Fos+	tot chat+	chat+Fos+	% fos+	%chat fos+
SI-set1_b1_1	1020	50	11	2
SI-set1_b1_2	1090	76	8	3
SI-set1_b2_1	750	47	1	3
SI-set1_b2_2 pic	876	65	15	4
SI-set1_b2_3	1020	98	17	3
SI-set1_b2_4	1240	75	8	0
SI-set1_b2_5	920	56	10	2
tot	6916	467	70	17	6.75246	24.2857
SI-set3_b1_1	1175	110	14	2
SI-set3_b1_2	1225	148	23	3
SI-set3_b1_3	1200	67	34	3
	1475	94	12	0
tot	5075	419	83	8	8.25616	9.63855
SI-set4_b1_1	800	46	15	3
SI-set4_b2_3	875	28	7	0
SI-set4_b2_2b1	900	47	4	1
SI-set4_b2_4	975	66	7	1
SI-set4_b3_1	1012	54	11	1
tot	4562	241	44	6	5.28277	13.6364
	tot nuclei#	tot Fos+	tot chat+	chat+Fos+	% fos+	%chat fos+
SI-set2_b1_1	1200	32	7	4
SI-set2_b1_2	1080	48	5	2
SI-set2_b1_3	1240	117	4	0
SI-set2_b2_2	900	83	9	1
SI-set2_b2_3	1160	120	15	1
SI-set2_b2_4	980	47	16	1
SI-set2_b3_1	880	29	12	7
SI-set2_b3_2	1000	92	7	2
SI-set2_b4_1	840	78	8	4
SI-set2_b4_2	940	72	11	2
tot	10220	718	94	24	7.02544	25.5319
Average c-Fos counting
HCC fos+	HCC fos-Chat+	SI fos+	SI-fos+ Chat+
0.572884	0	6.75246	24.3
1.35252	0	8.25616	9.6
0.614693	1.163	5.28277	13.63
0.326721	0	7.02544	25.5

## Sheet: MS-ChAT (EA)
40X objective
HCC
sample	tot nuclei#	tot Fos+	tot chat+	chat+Fos+	% fos+	%chat fos+		Legend
naive set1_b1_1	201	1	7	0				set= animal
naive set1_b1_2	288	1	13	0				b= section
naive set1_b1_3	260	3	10	0				_n= field
naive set1_b1_4	242	0	10	0
naive set1_b1_5	253	0	16	0
naive set1_b2_6	211	0	12	0
naive set1_b2_7	162	0	7	0
naive set1_b2_8	246	2	8	0
naive set1_b2_9	167	0	8	0
naive set1_b2_10	234	3	11	0
naive set1_b2_11	406	2	18	0
tot	2670	12	120	0	0.449438	0
naive set2_b1_1	310	0	9	0
naive set2_b1_2	292	1	17	0
naive set2_b1_3	230	0	12	0
naive set2_b1_4	285	0	12	0
naive set2_b1_5	283	0	15	0
naive set2_b2_1	259	5	11	0
naive set2_b2_2	257	2	10	0
naive set2_b2_3	267	0	13	0
naive set2_b2_4	312	3	12	0
naive set2_b2_5	308	0	5	0
tot	2803	11	116	0	0.392437	0
naive set3_b2_1	43	0	4	0
naive set3_b2_2	232	0	8	0
naive set3_b2_3	215	0	4	0
naive set3_b2_4	202	0	9	0
naive set3_b1_1	168	1	3	0
naive set3_b1_2	161	0	3	0
naive set3_b1_3	175	0	3	0
naive set3_b1_4	121	1	0	0
tot	1317	2	34	0	0.15186	0
naive set4_b1_1	194	0	7	0
naive set4_b1_2	199	0	6	0
naive set4_b1_3	195	0	12	0
naive set4_b1_4	148	1	8	0
naive set4_b1_5	151	0	15	0
naive set4_b2_1	238	0	15	0
naive set4_b2_2	219	0	19	0
naive set4_b2_3	217	0	8	0
tot	1561	1	90	0	0.0640615	0
Empty Arena
File name	tot nuclei#	tot Fos+	tot chat+	chat+Fos+	% fos+	%chat fos+
EA set1_b1_1	213	5	5	0
EA set1_b1_2	317	20	9	0
EA set1_b1_3	251	22	10	1
EA set1_b1_4	190	13	9	0
EA set1_b1_5	215	7	9	0
EA set1_b1_6	100	2	8	0
EA set1_b1_7	194	5	8	0
EA set1_b1_8	258	10	9	0
EA set1_b1_9	229	6	8	0
EA set1_b1_10	287	13	11	0
tot	2254	103	86	1	4.56965	1.16279
EA set2_b1_2	256	5	6	0
EA set2_b1_3	320	4	4	0
EA set2_b1_4	365	0	14	0
EA set2_b1_5	231	1	14	0
EA set2_b2_1	242	3	13	0
tot	1414	13	51	0	0.919378	0
EA set4_b1_1	235	8	13	0
EA set4_b1_2	241	10	13	0
EA set4_b1_3	269	9	11	0
EA set4_b1_4	299	4	14	0
EA set4_b1_5	270	0	10	0
EA set4_b2_1	201	4	5	0
EA set4_b2_2	203	6	3	0
EA set4_b2_3	249	1	12	0
EA set4_b2_4	268	9	13	0
EA set4_b2_5	323	11	14	0
EA set4_b2_6	218	15	11	0
tot	2776	77	119	0	2.77378	0
EA set3_b1_1	175	1	9	0
EA set3_b1_2	160	4	16	0
EA set3_b1_3	168	5	9	0
EA set3_b1_4	157	13	6	0
EA set3_b1_5	172	8	10	0
EA set3_b2_1	174	5	8	0
EA set3_b2_2	164	10	6	0
EA set3_b2_3	199	1	5	0
EA set3_b2_4	224	0	16	0
EA set3_b2_5	182	0	6	0
tot	1775	47	91	0	2.64789	0
Average c-Fos counting
HCC-fos+	HCC-fos+-Chat+	EA-fos+	EA-fos+-Chat+
0.449438	0	4.56965	0
0.392437	0	0.919378	0
0.15186	0	2.77378	0
0.0640615	0	2.64789	0
