# Supplementary material for: Septal cholinergic input to CA2 hippocampal region controls social novelty discrimination via nicotinic receptor-mediated disinhibition
Source: eLife. 2021 Oct 26;10:e65580. doi: 10.7554/eLife.65580 (PMC8547952; doi:10.7554/eLife.65580)
Supplement: Figure 4—source data 1. [file elife-65580-fig4-data1.xlsx]

## Sheet: eYFP-hM4 sociability
	Animal	Empty cup	Animal	Empty cup	score	score
eYFP_1	225	134.1			90.9
eYFP_2	203.5	142.7			60.8
eYFP_1	136.18	114.3			21.9
eYFP_2	105.75	93.35			12.4
eYFP_1	92.79	127.58			-34.8
eYFP_2	144.83	67.465			77.4
eYFP_3	142.02	95.525			46.5
eYFP_1	148.88	105.89			43
eYFP_2	177.93	59.9			118
eYFP_1	139.21	100.8			38.41
eYFP_2	85.64	75.78			9.86
eYFP_3	126.73	71.33			55.4
hM4mcherry_1_			135.3	130.1		5.2
hM4mcherry_2_			269.5	146.3		123.2
hM4mcherry_3_			95.5	143.2		-47.7
hM4mcherry_4_			219.6	124		95.6
hM4 mcherry_1			137.205	159.74		-22.5
hM4 mcherry_2			130.68	78.665		52
hM4 mcherry_3			116.345	90.55		25.8
hM4 mcherry_1			170.02	116.54		53.5
hM4 mcherry_2			170.32	92.46		77.9
hM4 mcherry_3			149.86	104.39		45.5
hM4mcherry_1			193.3	62.43		130.87
hM4mcherry_2			126.02	85.86		40.16
hM4mcherry_3			171.31	87.14		84.17

## Sheet: eYFP-hM4-CNO social novelty
	Familiar	Novel	Familiar	Novel	score	score
eYFP_1	62.24	96.9			34.7
eYFP_2	43.64	81.74			38.1
eYFP_1	51.9	60.46			8.6
eYFP_2	29.21	67.9			38.7
eYFP_1	24.82	51.79			27
eYFP_2	72.52	45.02			-27.5
eYFP_3	55.78	39.78			-16
eYFP_1	34.04	93.09			59.1
eYFP_2	55	79.45			24.5
eYFP_1	79.42	131.97			52.55
eYFP_2	9.49	78.26			68.77
eYFP_3	43.64	79.95			36.31
hM4mcherry_1_			86.22	79.88		-6.3
hM4mcherry_2_			103.17	34.11		-69.1
hM4mcherry_3_			55.28	17.02		-38.3
hM4mcherry_4_			80.12	74.05		-6.1
hM4 mcherry_1			64.81	56.3		-8.5
hM4 mcherry_2			99.18	71.24		-27.9
hM4 mcherry_3			39.87	35.86		-4
hM4 mcherry_1			71.78	121.45		49.7
hM4 mcherry_2			61.94	83.1		21.2
hM4 mcherry_3			64.12	55.11		-9
hM4mcherry_1			91.56	93.72		2.16
hM4mcherry_2			45.79	39.7		-6.09
hM4mcherry_3			64.29	168.53		104.24

## Sheet: % c-Fos nuclei CA2
20X objective
sample		n fos+ nuclei	n tot nuc		% of fos+ nuclei
HCC
naive set1_b1_1		2	80
naive set1_b2_1		3	70
naive set1_b2_2		7	60
tot		12	210		5.71429
naive set2_b1_1		3	87
naive set2_b1_2		2	80
naive set2_b2_1		2	62
naive set2_b2_2		6	58
tot		13	270		4.81481
naive_set3_b1_2		6	87
naive_set3_b1_3		1	75
naive_set3_b2_1		1	55
naive_set3_b2_2		4	56
tot		12	273		4.3956
Social interaction
eYFP set1_b1_1		4	57
eYFP set1_b1_2		11	80
tot		15	137		10.9489
eYFP set2_b2_1		9	108
eYFP set2_b2_2		18	110
eYFP set2_b2_5		37	135
eYFP set2_b2_6		20	95
tot		84	448		18.75
eYFP set3_b1_1		7	108
eYFP set3_b2_1		13	75
eYFP set3_b2_3		11	93
tot		31	276		11.2319
eYFP set4_b1_1		10	112
eYFP set4_b3_1		8	120
tot		18	232		7.75862
Social interaction
hM4 CNO set1_b1_1		8	90
hM4 CNO set1_b1_2		3	97
hM4 CNO set1_b1_3		6	80
tot		17	267		6.36704
hM4 CNO set2_b1_1		4	63
hM4 CNO set2_b1_2		2	52
tot		6	115		5.21739
hM4 CNO set3_b1_1		4	60
hM4 CNO set3_b1_3		1	68
hM4 CNO set3_b1_5		4	62
hM4 CNO set3_b1_7		5	75
tot		14	265		5.28302
hM4 CNO set4_b1_3		2	99
hM4 CNO set4_b2_1		4	87
tot		6	186		3.22581
average
HCC	eYFP-SI	hM4-SI
5.71429	10.9489	6.36704
4.81481	18.75	5.21739
4.3956	11.2319	5.28302
	7.75862	3.22581
