# Supplementary material for: Septal cholinergic input to CA2 hippocampal region controls social novelty discrimination via nicotinic receptor-mediated disinhibition
Source: eLife. 2021 Oct 26;10:e65580. doi: 10.7554/eLife.65580 (PMC8547952; doi:10.7554/eLife.65580)
Supplement: Figure 5—source data 1. [file elife-65580-fig5-data1.xlsx]

## Sheet: eYFP-hM4-CA2 sociability
	Animal	Object	Animal	Object	score	score
eYFP_#1	139.02	99.02			40
eYFP_#2	156.675	93.79			62.885
eYFP_#3	160.12	108.17			51.95
eYFP_#4	172.685	135.64			37.045
eYFP_#1	223.26	78.26			145
eYFP_#1	288.08	112.17			175.91
eYFP_#2	180.19	102.11			78.08
eYFP_#3	117.69	78.77			38.92
eYFP_#3	160.52*	65.21*			95.3*		excluded for cannula misplacement
eYFP_#1	194.57	50.82			143.75
eYFP_#2	198.37	108.995			89.38
eYFP_#1	179.17	22.955			156.22
eYFP_#2	222.24	91.525			130.72
eYFP_#1	205.29	66.76			138.53
eYFP_#2	165.34	68.18			97.15
eYFP_#3	169.21	63.03			106.18
hM4mcherry_3			184.715	79.86		104.855
hM4mcherry_4			179.805	83.525		96.28
hM4 mcherry_5			121.84	78.555		43.285
hM4 mcherry_6			94.56	79.79		14.77
hM4mcherry_1			268.49	80.34		188.15
hM4mcherry_2			309.85	102.91		206.94
hM4mcherry_3			311.31	89.59		221.72
hM4_#1_			261.38	109.78		151.6
hM4_#2_			302.3*	83.32*		218.99*	excluded for cannula misplacement
hM4_#3_			190.41*	106.86*		83.55*	excluded for cannula misplacement
hM4mcherry_1_			219.71*	106.42*		113.3*	excluded for cannula misplacement
hM4mcherry_2_			228.69*	79.99*		148.7*	excluded for cannula misplacement
hM4mcherry_1			162.415	62.52		99.9
hM4mcherry_2			215.08	71.865		143.22
hM4mcherry_3			227.74	83.295		144.45
hM4mcherry_1			231.915	73.37		158.55
hM4mcherry_#1			175.05	93.44		81.61
hM4mcherry_#2			159.2	106.97		52.23
hM4mcherry_#3			179.31*	101.17*		78.14*	no hM4 expression in the MSDB

## Sheet: eYFP-hM4-CA2 CNO social novelty
	Familiar	Novel	Familiar	Novel	score	score
eYFP_#1	23.96	66.06			42.1
eYFP_#2	34.37	23.54			-10.8
eYFP_#3	48.67	105.33			56.7
eYFP_#4	36.64	42.71			6.1
eYFP_#1	21.23	100.59			79.4
eYFP_#1	32.5	113.53			81
eYFP_#2	38.79	116.37			77.58
eYFP_#3	53.9	41.51			-12.39
eYFP_#3	65.45*	98.46*			33*		excluded for cannula misplacement
eYFP_#1	74.86	94.2			19.34
eYFP_#2	102.83	149.48			46.65
eYFP_#1	53.25	60.77			7.52
eYFP_#2	95.78	215.44			119.66
eYFP_#1	85.18	203.12			117.94
eYFP_#2	49.87	78.07			28.2
eYFP_#3	43.06	94.77			51.71
hM4mcherry_3			23.35	78.74		55.4
hM4mcherry_4			81.32	45.16		-36.2
hM4 mcherry_5			17.2	5.2		-12
hM4 mcherry_6			36.64	34.07		-2.6
hM4mcherry_1			121.94	132.49		10.6
hM4mcherry_2			65.78	133.43		67.7
hM4mcherry_3			156.73	105.26		-51.5
hM4_#1_			116.42	200.25		83.83
hM4_#2_			77.31*	105.25*		27.94*	excluded for cannula misplacement
hM4_#3_			39.14*	77.19*		38.05*	excluded for cannula misplacement
hM4mcherry_1_			142.48*	112.47*		-30*	excluded for cannula misplacement
hM4mcherry_2_			80.95*	186.09*		105.1*	excluded for cannula misplacement
hM4mcherry_1			105.72	69.1		-36.62
hM4mcherry_2			87.49	90.29		2.8
hM4mcherry_3			110.69	128.01		17.32
hM4mcherry_1			70.26	115.27		45.01
hM4mcherry_#1			88	68.47		-19.53
hM4mcherry_#2			69.51	67.53		-1.98
hM4mcherry_#3			74.12*	112.7*		38.58*	no hM4 expression in the MSDB
