# Supplementary material for: Septal cholinergic input to CA2 hippocampal region controls social novelty discrimination via nicotinic receptor-mediated disinhibition
Source: eLife. 2021 Oct 26;10:e65580. doi: 10.7554/eLife.65580 (PMC8547952; doi:10.7554/eLife.65580)
Supplement: Figure 6—source data 1. [file elife-65580-fig6-data1.xlsx]

## Sheet: CA2 sociability
		animal	object	animal	object	score	score
control_3		89.55	64.29			25.26
control_4		165.59	114.22			51.37
control_4		119.96	75.19			44.77
control_1		130.79	85.28			45.51
control_2		149.62	126.71			22.91
control_5		147.33	84.16			63.17
control_2		100.48	94.25			6.23
control_3		114.475	87.32			27.155
control_2		96.1*	118.9*			-22.785*		excluded for no interaction during sociability
control_1		92.91	75.34			17.57
control_2		149.5	66.58			82.92
DHbetaE_1				173.21	65.95		107.27
DHbetaE_1				138.21*	67.83*		70.38*	excluded for cannula displacement
DHbetaE_3				99.19	42.16		57.03
DHbetaE_3				125.55	135.98		-10.43
DHbetaE_4				141.71	110.88		30.83
DHbetaE_1				172.55	76.695		95.855
DHbetaE_3				175.51	105.86		69.65
DHbetaE_1				56.2	31.855		24.345
DHbetaE_2				81.695	73.555		8.14
DHbetaE_3				171.15	78.54		92.61
DHbetaE_1				90.41	50.44		39.97
DHbetaE_2				118.03	96.11		21.92

## Sheet: Saline-DhBE-CA2 social novelty
	Familiar	Novel	Familiar	Novel	score	score
control_3	39.51	56.35			16.84
control_4	44.27	105.73			61.46
control_4	40.05	89.78			49.73
control_1	49.37	54.66			5.29
control_2	64.05	196.83			132.78
control_5	115.64	59.17			-56.47
control_2	67.73	126.29			58.56
control_3	29.45	73.1			43.65
control_2	15.5*	37.15*			21.65*		excluded for no interaction during sociability
control_1	45.83	87.29			41.46
control_2	45.95	82.74			36.79
			115.5	61.3		-54.2
DHbetaE_1			67.68*	69.65*		1.97*	excluded for cannula displacement
DHbetaE_1			60.16	22.15		-38.01
DHbetaE_3			102.27	49.7		-52.57
DHbetaE_3			63.85	47.11		-16.74
DHbetaE_4			55.56	122.07		66.51
DHbetaE_1			74.04	101.05		27.01
DHbetaE_3			47.97	57.39		9.42
DHbetaE_1			47.48	17.42		-30.06
DHbetaE_2			97.8	30.9		-66.9
DHbetaE_3			37.95	49.45		11.5
DHbetaE_1			71.15	10.32		-60.83
DHbetaE_2
