# Supplementary material for: Septal cholinergic input to CA2 hippocampal region controls social novelty discrimination via nicotinic receptor-mediated disinhibition
Source: eLife. 2021 Oct 26;10:e65580. doi: 10.7554/eLife.65580 (PMC8547952; doi:10.7554/eLife.65580)
Supplement: Figure 7—source data 1. [file elife-65580-fig7-data1.xlsx]

## Sheet: sEPSCs CA2_Control-Nicotine 
	control	nicotine 1uM	control	nicotine 1uM
frequency
16-10-20_a	1.23333	2.21667
16-10-20_a	1.28333	1.26667
20-10-20_a	1.43333	2.65
21-10-20_a	0.85	0.95
23-10-20_a	0.8	2.3
23-10-20_b	0.533333	0.65
25-10-20_a	1.01667	1.76667
25-10-20_b	0.433333	0.816667
25-10-20_c	0.283333	0.55
25-10-20_a	0.633333	1.33333
25-10-20_b	0.533333	2.05
25-10-20_c	0.833333	1.88333
25-10-20_a	0.666667	1.06667
amplitude			15.823	18.272
16-10-20_a			34	25.41
16-10-20_a			15.48	20.4
20-10-20_a			20.82	22.75
21-10-20_a			20.97	16.21
23-10-20_a			20.47	19.48
23-10-20_b			18.89	24.621
25-10-20_a			15.1304	19.6475
25-10-20_b			18.5914	21.6701
25-10-20_c			14.89	18.61
25-10-20_a			14.99	18.61
25-10-20_b			21.66	15.66
25-10-20_c			21.66	16.67
25-10-20_a			25.61	18.39

## Sheet: sEPSCs CA2_Nicotine-MLA
	control	nicotine 1uM	control	nicotine 1uM
frequency
2020_12_15_a	0.8	1.2
2020_12_16_a	2.2	2
2020_12_16_b	1.12	1.47
25_01_2021_a	1.83	1.55
26_01_2021_a	1.92	1.32
26_01_2021_b	1.48	1.63
26_01_2021_c	4.32	3.3
27_01_2021_a	2.25	1.97
28_01_2021_a	1.02	0.83
amplitude
2020_12_15_a			15.7	18
2020_12_16_a			18	16.15
2020_12_16_b			15.1	17.1
25_01_2021_a			16.27	22.3
26_01_2021_a			11	18.49
26_01_2021_b			13.64	12.31
26_01_2021_c			20.3	18.6
27_01_2021_a			12.5	13.1
28_01_2021_a			20.5	19.5

## Sheet: sEPSCs CA2_Nicotine-DHbetaE 
	control	nicotine 1uM	control	nicotine 1uM
frequency
2020_11_24_c1	0.88	0.68
2020_11_25_c1	0.63	0.78
2020_11_30_c1	1.48	3.02
2020_12_09_c1	0.77	1.13
2020_12_09_c2	0.22	0.23
2020_12_09_c3	1.03	0.3
2020_11_26_a	1.57	1.32
2020_11_26_b	0.9	1.27
2020_11_25_b	1.13	0.75
amplitude
2020_11_24_c1			13.41	13.73
2020_11_25_c1			16.82	19.04
2020_11_30_c1			21.68	25.03
2020_12_09_c1			10.72	15.68
2020_12_09_c2			12.17	16.7
2020_12_09_c3			19.52	13.93
2020_11_26_a			23.07	19.81
2020_11_26_b			16.61	18.39
2020_11_25_b			13.05	21.44
