# Supplementary material for: Septal cholinergic input to CA2 hippocampal region controls social novelty discrimination via nicotinic receptor-mediated disinhibition
Source: eLife. 2021 Oct 26;10:e65580. doi: 10.7554/eLife.65580 (PMC8547952; doi:10.7554/eLife.65580)
Supplement: Figure 8—source data 1. [file elife-65580-fig8-data1.xlsx]

## Sheet: sEPSCs hM3_Control-CNO CA2
	control	CNO	control	CNO
frequency
30-03-21_a_Mari	2.08	2.02
30-03-21_c_Mari	1.58	2.77
31-03-21_a_Mari	0.67	0.72
31-03-21_c_Mari	1.43	1.8
01-04-21_a_Mari	1.15	1.45
30-03-21_a_Mimmo	0.48	0.73
31-03-21_a_Mimmo	0.33	0.53
14-04-2021_b_mimmo	0.12	0.33
amplitude
30-03-21_a_Mari			16.87	15.46
30-03-21_c_Mari			18.45	13.34
31-03-21_a_Mari			17.87	22.25
31-03-21_c_Mari			17.16	18.3
01-04-21_a_Mari			21.54	22.36
30-03-21_a_Mimmo			14.33	13.5
31-03-21_a_Mimmo			15.82	20.42
14-04-2021_b_mimmo			19.7	16.1

## Sheet: sEPSCs hM3_Control-CNO CA3
	control	CNO	control	CNO
frequency
12-04-21_a_Mari	4.18	2.52
12-04-21_c_Mari	10.67	1.73
13-04-21_a_Mari	4.95	2.62
13-04-21_b_Mari	5.28	5.03
13-04-21_c_Mari	1.53	0.73
31-03-21_b_mimmo	2.67	2.25
12-04-21_a_mimmo	6.68	2.98
12-04-21_b_mimmo	1.05	1.28
13_04_21_a_mimmo	3	1.88
14-01-21_a_Mari	5.2	3.61667
14-01-21_b_Mari	6.22	2.95
amplitude
12-04-21_a_Mari			25.5505	22.0697
12-04-21_c_Mari			22.4761	18.0543
13-04-21_a_Mari			23.9418	19.1254
13-04-21_b_Mari			27.2498	22.9791
13-04-21_c_Mari			18.1923	17.8793
31-03-21_b_mimmo			23.8	25.5
12-04-21_a_mimmo			29.4	28
12-04-21_b_mimmo			17.36	18.4
13_04_21_a_mimmo			24.77	23.12
14-01-21_a_Mari			19.0868	17.0078
14-01-21_b_Mari			27.3572	26.8642

## Sheet: sEPSCs hM3_Control-CNO CA1
	control	CNO	control	CNO
frequency
29-03-21_a_Mari	0.45	0.43
30-03-21_b_Mari	3.05	3.17
30-03-21_d_Mari	0.52	0.4
31-03-21_a_Mari	1.47	1.48
1-04-21_b_Mari	1.28	0.9
1-04-21_c_Mari	0.82	2.4
14-04-21_a_Mari	0.33	0.6
30-03-21_b_mimmo	0.95	0.37
30-03-21_c_mimmo	1.3	0.33
31-03-21_d_mimmo	0.12	0.18
01-04-21-_a_mimmo	4.92	4.3
14-01-21_a_mimmo	1.15	0.73
amplitude
29-03-21_a_Mari			17.4359	16.8242
30-03-21_b_Mari			15.8661	15.8719
30-03-21_d_Mari			17.7642	20.4091
31-03-21_a_Mari			16.4765	15.6835
1-04-21_b_Mari			19.2818	15.5139
1-04-21_c_Mari			28.8067	24.9132
14-04-21_a-Mari			21.9768	17.4054
30-03-21_b_mimmo			16.85	18.6
30-03-21_c_mimmo			19.89	19
31-03-21_d_mimmo			17.54	17.04
01-04-21-_a_mimmo			24.04	23.74
14-01-21_a_mimmo			17.39	17.9
