# Supplementary material for: Septal cholinergic input to CA2 hippocampal region controls social novelty discrimination via nicotinic receptor-mediated disinhibition
Source: eLife. 2021 Oct 26;10:e65580. doi: 10.7554/eLife.65580 (PMC8547952; doi:10.7554/eLife.65580)
Supplement: Figure 9—source data 1. [file elife-65580-fig9-data1.xlsx]

## Sheet: Control-1Hz light_ ChR2 mice
	total spike frequency				frequency within the burst
	control	1 Hz light			control	1 Hz light
8/9/2016	6.6	7.2			55.1003	44.6573
13/9/2016a	0.916667	1.275			169.382	167.506
13/9/2016 b	0.258333	1.69167			176.855	183.156
16/9/2016 b	5.13333	6.15			73.5709	60.731
10/09/2018a*	0.383333333*	3.03333333*					excluded for no bursting behavior
12/9/2018a	0.833333	1.43333			134.511	115.586
12/9/2018c	1.68333	2.38333			195.33	201.516
13/09/2018a	7.98333	7.56667			70.3144	54.6142
25/10/2018c	2.2	2.63333			136.464	131.344
15/05/2019a	6.95	8			50.0955	64.4021
17/05/2021c	1.77	2.17			60.9312	65.923
